# Supplementary material
Source: PubMed Central journal article supplement (PMC6248771)
Supplement: supplemental_table_s1_mdx736.pdf [file supplemental_table_s1_mdx736.pdf]

| GENDER | AGE AT DIAGNOSIS | SMOKING HISTORY | ASSOCIATED SNSCC? | EGFR status      | HPV status    |
|--------|------------------|-----------------|-------------------|------------------|---------------|
| M      | 52               | Yes             | No                | E746_S752delinsT | Negative      |
| F      | 69               | Yes             | No                | E746_S752delinsT | Negative      |
| M      | 54               | No              | No                | L747P            | Negative      |
| M      | 64               | No              | No                | A767_V769dup     | Negative      |
| M      | 26               | Yes             | No                | S768_D770dup     | Negative      |
| M      | 28               | Yes             | No                | S768_D770dup     | Negative      |
| M      | 29               | Yes             | No                | S768_D770dup     | Negative      |
| M      | 31               | Yes             | No                | S768_D770dup     | Negative      |
| M      | 33               | No              | No                | S768_D770dup     | Negative      |
| M      | 33               | Yes             | No                | S768_D770dup     | Negative      |
| M      | 43               | No              | No                | S768_D770dup     | Negative      |
| M      | 45               | No              | No                | S768_D770dup     | Negative      |
| F      | 46               | Yes             | Yes               | S768_D770dup     | Negative      |
| M      | 50               | Yes             | Yes               | S768_D770dup     | Negative      |
| M      | 51               | Unknown         | Yes               | S768_D770dup     | Negative      |
| F      | 64               | Yes             | Yes               | S768_D770dup     | Negative      |
| F      | 77               | Yes             | No                | S768_D770dup     | Negative      |
| M      | 78               | No              | No                | S768_D770dup     | Negative      |
| M      | 45               | Yes             | No                | D770_N771insG    | Negative      |
| M      | 59               | Yes             | Yes               | D770_N771insGD   | Negative      |
| M      | 46               | No              | No                | D770_N771insGF   | Negative      |
| M      | 58               | Yes             | No                | D770_N771insGF   | Negative      |
| M      | 56               | Yes             | Yes               | D770_N771insGL   | Negative      |
| M      | 63               | Yes             | Yes               | D770_N771insSVE  | Negative      |
| M      | 48               | No              | No                | D770_P772dup     | Negative      |
| F      | 51               | No              | No                | D770_P772dup     | Negative      |
| M      | 53               | Yes             | Yes               | N771delinsGF     | Negative      |
| M      | 55               | Yes             | No                | N771delinsGF     | Negative      |
| F      | 62               | Yes             | No                | N771delinsGF     | Negative      |
| F      | 66               | Yes             | No                | N771delinsGF     | Negative      |
| M      | 42               | No              | No                | N771delinsGY     | Negative      |
| M      | 44               | Yes             | No                | N771delinsGY     | Negative      |
| M      | 35               | No              | No                | N771delinsSG     | Negative      |
| M      | 48               | No              | Yes               | N771_P772insV    | Negative      |
| M      | 29               | No              | No                | N771_H773dup     | Negative      |
| M      | 35               | Yes             | No                | N771_H773dup     | Negative      |
| M      | 45               | No              | No                | N771_H773dup     | Negative      |
| M      | 46               | Yes             | No                | N771_H773dup     | Negative      |
| M      | 50               | Yes             | No                | N771_H773dup     | Negative      |
| M      | 55               | Yes             | Yes               | N771_H773dup     | Negative      |
| M      | 62               | Yes             | Yes               | N771_H773dup     | Negative      |
| M      | 69               | Yes             | No                | N771_H773dup     | Negative      |
| M      | 84               | Yes             | No                | N771_H773dup     | Negative      |
| M      | 41               | Yes             | No                | P772dup          | Negative      |
| F      | 43               | Yes             | No                | P772_H773insTNR  | Negative      |
| M      | 49               | No              | No                | H773dup          | Negative      |
| F      | 57               | No              | No                | H773dup          | Negative      |
| M      | 59               | No              | No                | H773dup          | Negative      |
| M      | 62               | Yes             | No                | H773dup          | Negative      |
| M      | 69               | Yes             | No                | H773dup          | Negative      |
| M      | 26               | Yes             | No                | H773_V774dup     | Negative      |
| M      | 62               | No              | No                | H773_V774insGCRH | Negative      |
| M      | 47               | No              | No                | H773_V774insGNPH | Negative      |
| F      | 24               | No              | No                | WT               | Positive (11) |
| M      | 47               | Yes             | Yes               | WT               | Positive (11) |
| M      | 62               | Yes             | Yes               | WT               | Positive (11) |
| F      | 54               | Yes             | No                | WT               | Positive (6)  |
| M      | 44               | Yes             | Yes               | WT               | Positive (6)  |

| TYPE(S)   | GENDER | AGE AT DIAGNOSIS | SMOKING HISTORY? | EGFR status      | HPV status         |
|-----------|--------|------------------|------------------|------------------|--------------------|
| ISP-SNSCC | F      | 67               | No               | E746_S752delinsV | Negative           |
| ISP-SNSCC | M      | 72               | Yes              | E746_S752delinsV | Negative           |
| ISP-SNSCC | F      | 46               | Yes              | S768_D770dup     | Negative           |
| ISP-SNSCC | M      | 50               | Yes              | S768_D770dup     | Negative           |
| ISP-SNSCC | M      | 51               | Unknown          | S768_D770dup     | Negative           |
| ISP-SNSCC | F      | 64               | Yes              | S768_D770dup     | Negative           |
| ISP-SNSCC | F      | 59               | Yes              | D770_N771insG    | Negative           |
| ISP-SNSCC | M      | 59               | Yes              | D770_N771insGD   | Negative           |
| ISP-SNSCC | M      | 56               | Yes              | D770_N771insGL   | Negative           |
| ISP-SNSCC | M      | 63               | Yes              | D770_N771insSVE  | Negative           |
| ISP-SNSCC | M      | 34               | Yes              | N771_H773dup     | Negative           |
| ISP-SNSCC | F      | 42               | No               | N771_H773dup     | Negative           |
| ISP-SNSCC | M      | 48               | Yes              | N771_H773dup     | Negative           |
| ISP-SNSCC | M      | 48               | No               | N771_P772insV    | Negative           |
| ISP-SNSCC | M      | 55               | Yes              | N771_H773dup     | Negative           |
| ISP-SNSCC | M      | 62               | Yes              | N771_H773dup     | Negative           |
| ISP-SNSCC | M      | 53               | Yes              | N771delinsGF     | Negative           |
| ISP-SNSCC | M      | 44               | Yes              | WT               | Positive (6)       |
| ISP-SNSCC | F      | 56               | Yes              | WT               | Positive (6)       |
| ISP-SNSCC | F      | 46               | Yes              | WT               | Positive (11)      |
| ISP-SNSCC | M      | 47               | Yes              | WT               | Positive (11)      |
| ISP-SNSCC | F      | 62               | Yes              | WT               | Positive (16)      |
| SNSCC     | M      | 28               | No               | WT               | Negative           |
| SNSCC     | F      | 54               | No               | WT               | Negative           |
| SNSCC     | M      | 57               | Yes              | WT               | Negative           |
| SNSCC     | F      | 60               | Yes              | WT               | Negative           |
| SNSCC     | M      | 63               | Yes              | WT               | Negative           |
| SNSCC     | F      | 65               | Yes              | WT               | Negative           |
| SNSCC     | M      | 65               | Yes              | WT               | Negative           |
| SNSCC     | M      | 72               | Yes              | WT               | Negative           |
| SNSCC     | M      | 76               | Yes              | WT               | Negative           |
| SNSCC     | F      | 67               | Yes              | WT               | Positive (16)      |
| SNSCC     | M      | 72               | Yes              | WT               | Positive (16)      |
| SNSCC     | F      | 58               | Yes              | WT               | Positive (18)      |
| SNSCC     | M      | 64               | Yes              | WT               | Positive (33)      |
| SNSCC     | M      | 65               | Yes              | WT               | Positive (unknown) |
